# Supplementary material for: Stability and particle size control of self-assembled cadmium–aluminum layered double hydroxide
Source: Royal Society of Chemistry journal article supplement (doi:10.1039/c6ce02017h), 2016-01-01
Supplement: c6ce02017h1.pdf [file c6ce02017h1.pdf]

# Stability and Particle Size Control of the Cadmium- Aluminum Layered Double Hydroxide

## Electronic Supplementary Information (ESI)

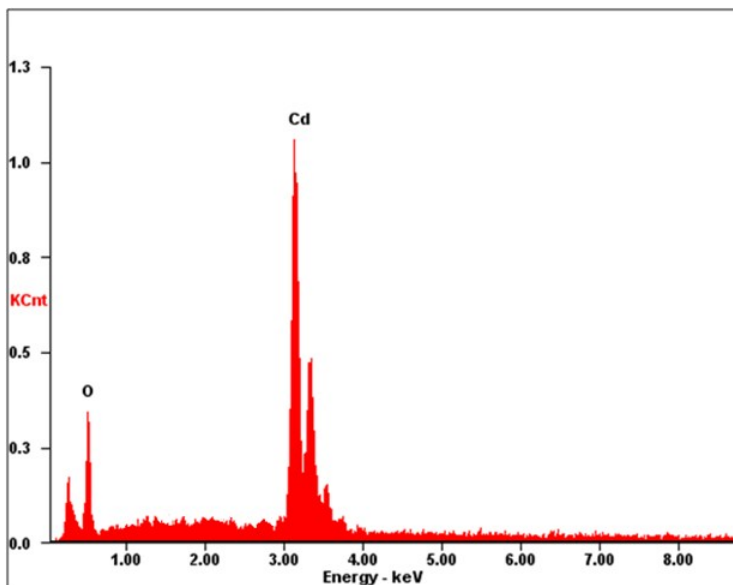

**Figure S1.** Energy dispersive X-ray (EDX) spectrum of the white precipitate ( $\beta$ - $\text{Cd}(\text{OH})_2$ ).

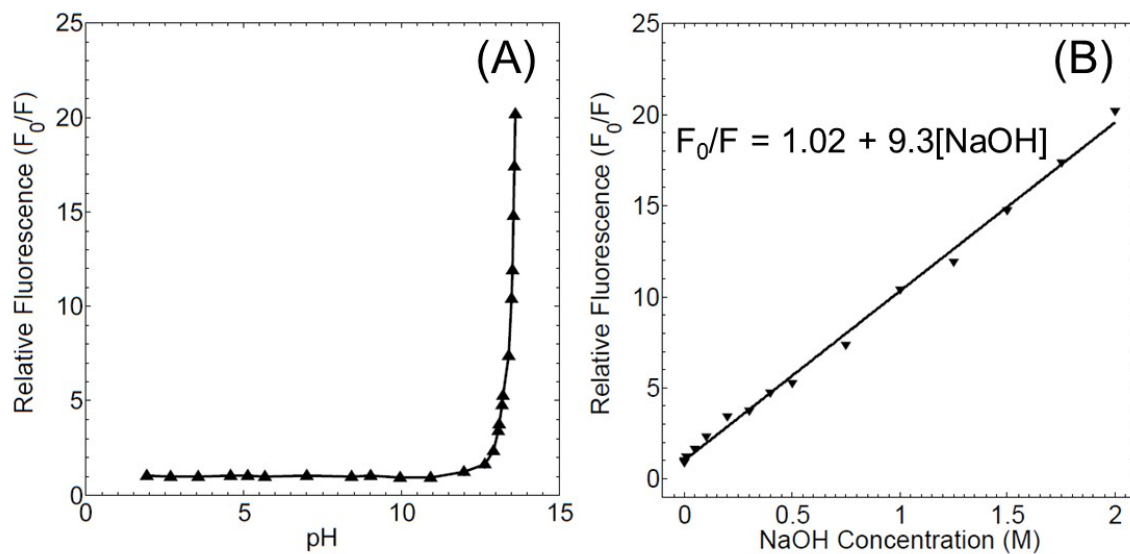

**Figure S2.** Graph showing the variation of the relative fluorescence intensity of Rhodamine 6G (Rh6G) with respect to the medium's pH (A) and sodium hydroxide concentration (B).  $F_0$  and  $F$  are the fluorescence signal of Rh6G before and after addition of sodium hydroxide or hydrochloric acid, respectively.
